# Supplementary material
Source: HighWire-hosted journal article supplement (https://www.cmaj.ca/highwire/filestream/59514/field_highwire_adjunct_files/0/150904-res-1-at.pdf)

## **Appendix 1 (as supplied by the authors): Tables and Figures**

Appendix Table 1: Definitions of comorbid conditions and medications, on the basis of codes and prescriptions in 730 days before treatment intensification

Appendix Table 2: Description of propensity score model and supplemental Table 2 Logistic regression model for the probability of intensifying with Metformin+ Insulin

Appendix Table 3: Full Table of Patient Characteristics

Appendix Table 4: Characteristics of cohort of patients in the first 6 months after initiation of sulfonylurea or insulin and after propensity score matching

Appendix Table 5: Event rates and adjusted hazard with 95% confidence intervals for risk of first hypoglycemic event and recurrent hypoglycemic event using sensitivity analysis

Appendix Table 6: Event rates and adjusted hazard with 95% confidence intervals for risk of first hypoglycemic event and recurrent hypoglycemic event by subgroups

Appendix Figure 1: Study design schematic

Appendix Figure 2: Distribution of propensity scores by drug

Appendix Figure 2: Adjusted hazard with 95% confidence intervals for risk of first hypoglycemic event and recurrent hypoglycemic event for main outcome definition and sensitivity outcome definitions

**Appendix Table 1: Definitions of comorbid conditions and medications, on the basis of codes and prescriptions in 730 days before treatment intensification**

| <b>Covariate Condition</b>                             | <b>Inclusive conditions</b>                                                                                                                                                                                                                                                                                                              | <b>Definition*</b>                                                                                                                                                                                                                                                                                                                                                                                                                                                                                                                                                                                                                                                                                                                                                                                                                                                                                                                                                                                                                                                                                                                                                                                                                                                                                                                                                        |
|--------------------------------------------------------|------------------------------------------------------------------------------------------------------------------------------------------------------------------------------------------------------------------------------------------------------------------------------------------------------------------------------------------|---------------------------------------------------------------------------------------------------------------------------------------------------------------------------------------------------------------------------------------------------------------------------------------------------------------------------------------------------------------------------------------------------------------------------------------------------------------------------------------------------------------------------------------------------------------------------------------------------------------------------------------------------------------------------------------------------------------------------------------------------------------------------------------------------------------------------------------------------------------------------------------------------------------------------------------------------------------------------------------------------------------------------------------------------------------------------------------------------------------------------------------------------------------------------------------------------------------------------------------------------------------------------------------------------------------------------------------------------------------------------|
| <b>Malignancy</b>                                      | Cancer excluding non melanoma skin cancer                                                                                                                                                                                                                                                                                                | ICD 9- CM diagnosis codes:140.X-208.X (exclude 173)                                                                                                                                                                                                                                                                                                                                                                                                                                                                                                                                                                                                                                                                                                                                                                                                                                                                                                                                                                                                                                                                                                                                                                                                                                                                                                                       |
| <b>Liver/ Respiratory failure</b>                      | <ol style="list-style-type: none"> <li>1. End stage liver disease</li> <li>2. Respiratory failure</li> </ol>                                                                                                                                                                                                                             | ICD 9- CM diagnosis codes: 570.X- 573.X<br>ICD 9- CM diagnosis codes: 518.81, 518.83, 518.84, 799.1, 415.X, 416.X                                                                                                                                                                                                                                                                                                                                                                                                                                                                                                                                                                                                                                                                                                                                                                                                                                                                                                                                                                                                                                                                                                                                                                                                                                                         |
| <b>Congestive Heart Failure Cardiovascular disease</b> | <p>CHF (excluding post procedure-CHF)</p> <ol style="list-style-type: none"> <li>1. MI</li> <li>2. Obstructive coronary disease</li> <li>3. TIA</li> <li>4. Stroke</li> <li>5. Peripheral artery disease revascularization or amputation</li> <li>6. Carotid revascularization</li> <li>7. Pentoxifylline &amp; related drugs</li> </ol> | <p>ICD 9- CM diagnosis codes: 428.X, 402.01, 402.11, 402.91, 404.01, 404.03, 404.11, 404.13, 404.91, 404.93, 425.X</p> <p>ICD 9- CM diagnosis codes:410.X, 412.X, 429.7X</p> <p>ICD 9- CM diagnosis codes:411.X, 413.X, 414.X</p> <p>ICD9-CM procedure codes: 36.01, 36.02, 36.03, 36.05, 36.09, 36.10-36.19</p> <p>CPT procedure codes: 33533-36, 33510-23, 33530, 92980-82,92984, 92995-6, 92974</p> <p>ICD 9- CM diagnosis codes: 435.X</p> <p>ICD 9- CM diagnosis codes: 430.X, 431.X, 434.X, 436.X</p> <p>ICD 9- CM diagnosis codes:440.2X, 442.2, 443.1, 443.9, 445.0X ICD9-CM procedure codes:38.08-09, 38.18, 38.38, 38.39, 38.48, 38.49, 38.88, 38.89, 39.25, 39.29, 39.5, 84.1X; 84.10-84.17</p> <p>CPT procedure codes: 35226,35256, 35286, 35351, 35355, 35371, 35372, 35381, 35454, 35456, 35459, 35473, 35474, 35482, 35483, 35485, 35492, 35493, 35495, 35546, 35548, 35549, 35551, 35556, 35558, 35563, 35565, 35566, 35571, 35583, 35585, 35587, 35646, 35651, 35654, 35656, 35661, 35663, 35665, 35666, 35671, 34800, 34802-5</p> <p>ICD9-CM procedure codes: 38.12, 38.11, 00.61, 00.63, 39.28</p> <p>CPT procedure codes: 35301, 0005T, 0006T, 0007T, 0075T, 0076T, 37215, 37216</p> <p>HCPCS procedure code: S2211</p> <p>Medications: Pentoxifylline, Cilostazol, Cyclandelate, Ethaverine HCL, Nicotiny Alcohol Tartate, Papaverine, Tolazolin</p> |
| <b>Serious Mental illness</b>                          | <ol style="list-style-type: none"> <li>1. Dementia</li> <li>2. Depression,</li> <li>3. Schizophrenia,</li> <li>4. Bipolar disorder</li> <li>5. Post traumatic stress disorder</li> </ol>                                                                                                                                                 | <p>ICD 9- CM diagnosis codes: 290.X, 291.2, 292.82, 294.1X, 331.0-331.1X, 331.82</p> <p>Medications: Donepezil, Rivastigmine, Galantamine, Tacrine, Memantine</p> <p>ICD 9- CM diagnosis codes: 311, 300.4, 296.2, 296.3, V79.0</p> <p>ICD 9- CM diagnosis codes: 295.X</p> <p>ICD 9- CM diagnosis codes: 296.0, 296.4X, 296.5X, 296.6X, 296.7, 296.80, 296.89</p> <p>ICD 9- CM diagnosis codes: 309.81</p>                                                                                                                                                                                                                                                                                                                                                                                                                                                                                                                                                                                                                                                                                                                                                                                                                                                                                                                                                               |

|                                           |                                                |                                                                                                                                                                                                                                                                                                                                                                                                                                    |
|-------------------------------------------|------------------------------------------------|------------------------------------------------------------------------------------------------------------------------------------------------------------------------------------------------------------------------------------------------------------------------------------------------------------------------------------------------------------------------------------------------------------------------------------|
| <b>Cardiac valve disease</b>              |                                                | ICD 9- CM diagnosis codes: 394.X, 395.X, 396.X, 424.0, 424.1                                                                                                                                                                                                                                                                                                                                                                       |
| <b>Arrhythmia</b>                         | 1. Atrial fibrillation/flutter                 | ICD 9- CM diagnosis codes: 427.3X                                                                                                                                                                                                                                                                                                                                                                                                  |
|                                           | 2. Arrhythmia and conduction disorder          | ICD 9- CM diagnosis codes: 426.X, 427.X                                                                                                                                                                                                                                                                                                                                                                                            |
| <b>Smoking</b>                            |                                                | ICD 9- CM diagnosis codes:305.1, V15.82, 989.84<br>Medications: Varenicline tartrate, Nicotine Replacement therapy (gum, patch, lozenge)                                                                                                                                                                                                                                                                                           |
| <b>COPD/ Asthma</b>                       |                                                | ICD 9- CM diagnosis codes:491.X, 492.X, 493.X, 496.X, V17.5, V81.3                                                                                                                                                                                                                                                                                                                                                                 |
| <b>HIV</b>                                |                                                | ICD 9- CM diagnosis codes: 042, 079.53, 795.71, V08<br>Medications: Zidovudine, Didanosine, Zalcitabine, Stavudine, Indinavir, Ritonavir, Saquinavir, Nevirapine, Nelfinavir, Delavirdine, Delavirdine, Abacavir, Amprenavir, Efavirenz, Lamivudine-Zidovudine, Ritonavir-Lopinavir, Abacavir-Lamivudine-Zidovudine                                                                                                                |
| <b>Parkinson's Disease</b>                |                                                | ICD 9- CM diagnosis codes: 332<br>Medications: Apokyn, Apomorphine, Carbidopa/levodopa, Entacapone, Pergolide, Pramipexole, Ropinirole, Rotigotine, Selegiline, Tolcapone, Zelapar, Azilect/Rasagiline, Emsam, Isocarboxazid, Phenelzine, Tranylcypromine                                                                                                                                                                          |
| <b>Medications</b>                        |                                                |                                                                                                                                                                                                                                                                                                                                                                                                                                    |
| <b>ACE Inhibitors or ARBs alone/combo</b> | ACE Inhibitors or ARBs alone/combo             | Benazepril, Captopril, Enalapril, Fosinopril, Lisinopril, Moexipril, Perindopril, Quinapril, Ramipril, Trandolapril, Candesartan, Eprosartan, Irbesartan, Losartan, Azilsartan, Olmesartan, Telmisartan, Valsartan                                                                                                                                                                                                                 |
| <b>Antipsychotics</b>                     | Atypical and typical antipsychotic medications | Lithium, Clozapine, Haloperidol, Loxapine, Lurasidone, Molindone, Olanzapine, Paliperidone, Quetiapine Fumerate; Risperidone, Aripiprazole, Asenapine, Ziprasidone, Chlorpromazine, Fluphenazine, Fluphenazine Deconate, Mesoridazine, Perphenazine, Thioridazine, Thiothixene; Trifluoperazine; Triflupromazine, Asenapine, Chlorprothixene, Iloperidone, Molindone, Promazine, Piperacetazine, Methotrimeprazine, Acetophenazine |
| <b>Antihypertensives</b>                  | 1. Beta-blockers                               | Acebutolol, Atenolol, Betaxolol, Bisoprolol, Carteolol, Carvedilol, Esmolol, Labetalol, Metoprolol Tartrate, Metoprolol Succinate, Propranolol, Penbutolol, Pindolol, Nadolol, Sotalol, Timolol, Nebivolol                                                                                                                                                                                                                         |
|                                           | 2. Calcium Channel Blockers                    | Amlodipine, Isradipine; Felodipine, Nifedipine, Nifedipine ER, Nicardipine; Diltiazem, Verapamil, Nimodipine; Nisoldipine; Bepridil, Amlodipine/Atorvastatin, Clevidipine Butyrate                                                                                                                                                                                                                                                 |

|                                                                    |                                                          |                                                                                                                                                                                                                                                                                                                                                                                                                                             |
|--------------------------------------------------------------------|----------------------------------------------------------|---------------------------------------------------------------------------------------------------------------------------------------------------------------------------------------------------------------------------------------------------------------------------------------------------------------------------------------------------------------------------------------------------------------------------------------------|
|                                                                    | 3. Thiazide diuretics/<br>Potassium sparing<br>diuretics | Chlorothiazide, Chlorthalidone, Hydrochlorothiazide,<br>Methyclothiazide, Trichlormethiazide, Metolazone, Indapamide,<br>Eplerenone; Amiloride, Spironolactone, Triamterene,<br>Hydrochlorothiazide/Triamterene,<br>Hydrochlorothiazide/Spironolactone, Bendroflumethiazide,<br>Benzthiazide, Cyclothiazide, Hydroflumethiazide, Polythiazide,<br>Quinethazone                                                                              |
|                                                                    | 4. Other<br>Antihypertensives                            | Doxazosin, Prazosin, Terazosin, Clonidine, Guanabenz,<br>Guanfacine, Hydralazine, Methyldopa, Metyrosine, Reserpine,<br>Minoxidil, Alfuzosin, Silodosin, Alseroxylon, Cryptenamine,<br>Deserpidine, Diazoxide Guanethidine, Iloprost, Mecamylamine,<br>Pargyline, Rescinnamine, Trimethaphan Camsylate                                                                                                                                      |
| <b>Anti-arrhythmics<br/>Digoxin and other<br/>inotropes</b>        | 1. Digoxin<br>2. Anti- Arrhythmics                       | Digoxin, Digitalis<br>Adenosine, Amiodarone, Lidocaine, Flecainide, Ibutilide, ,<br>Procainamide, Propafenone, Ropafenone, Quinidine,<br>Disopyramide, Verapamil, Dofetilide, Mexiletine, Moricizine,<br>Tocainide                                                                                                                                                                                                                          |
| <b>Anticoagulants and<br/>Platelet inhibitors,<br/>not aspirin</b> | 1. Anticoagulants<br>2. Platelet Inhibitors              | Warfarin, Argatroban, Bivalirudin, Dalteparin, Enoxaprin,<br>Eptifibatide, Fondaparinux, Heparin, Lepirudin, Tirofiban,<br>Tinzaparin, Reviparin, Nadroparin, Ardeparin, Certoparin,<br>Dabigatran<br>Clopidogrel, Ticlopidine, Aspirin/Dipyridamole, Dipyridamole<br>alone, Abciximab, Factor IX, Factor VIIa, Factor VIII,<br>Prasugrel, Ticagrelor                                                                                       |
| <b>Lipid lowering<br/>drugs</b>                                    | 1. Statins<br>2. Non-Statins                             | Atorvastatin, Fluvastatin, Lovastatin, Pravastatin, Simvastatin,<br>Rosuvastatin, Cerivastatin Pitavastatin, Lovastatin ER,<br>Ezetimibe/Simvastatin, Lovastatin/Niacin,<br>Amlodipine/Atorvastatin<br>Cholestyramine, Colesevelam, Clofibrate, Colestipol, Niacin,<br>Niacinamide, Fish Oil Concentrate, Omega 3 Fatty Acids,<br>Gemfibrozil, Fenofibrate, Fenofibric Acid, Ezetimibe Omacor,<br>Tricor/Fenofibrate, Ezetimibe/Simvastatin |
| <b>Nitrates</b>                                                    |                                                          | Amyl Nitrate, Isosorbide Dinitrate, Isosorbide Mononitrate,<br>Erythrityl Tetranitrate, Nitroglycerin (all forms--SA, Patch, SL,<br>Ointment; Aerosol spray), Ranolazine                                                                                                                                                                                                                                                                    |
| <b>Aspirin</b>                                                     |                                                          | Aspirin, Aspirin/ Dipyridamole                                                                                                                                                                                                                                                                                                                                                                                                              |
| <b>Loop Diuretics</b>                                              |                                                          | Furosemide, Ethacrynic acid, Bumetanide, Torsemide                                                                                                                                                                                                                                                                                                                                                                                          |

ACEI = angiotensin-converting enzyme inhibitor; ARB = angiotensin-receptor blocker; COPD = chronic obstructive pulmonary disease; CPT = Current Procedural Terminology; ICD-9- CM = International Classification of Diseases, Ninth Revision; MI = myocardial infarction; TIA = transient ischemic attack If medications are combinations of 2 drug classes then a patient is recorded as using both medications.

\* Each co-morbid condition was defined as present if there was 1 specified inpatient or 2 specified outpatient codes separated by 30 days, or 1 specified procedure code or prescription for a medication defining that comorbid condition in the 730 days before treatment intensification.

## Appendix Table 2: Details for the construction of the propensity score model

### Propensity Score

The cohort was composed of a subset of all eligible persons who initiated metformin+ insulin or metformin+ sulfonylurea after using metformin monotherapy for diabetes. The matched cohort was formed by matching metformin+ insulin users to 5 metformin+ sulfonylurea users with similar propensity scores. The propensity score (PS) is defined as the probability of metformin+ insulin use, given a particular pattern of baseline covariates (Appendix Table 2). We estimated the PS using a logistic regression model in which the dependent variable was 1 for patients who used metformin+ insulin and 0 for metformin+ sulfonylurea users. The model was simple logistic regression, with a third degree polynomial term for continuous covariates and VISN of care in the model. Unlike a model being used for direct covariate adjustment, the PS model is designed to be non-parsimonious and highly flexible to capture any possible confounding by indication. Table 1 in the paper lists baseline covariates included. Missing covariate values were multiply imputed. We utilized indicator variables to denote missingness. These indicator variables were also included in the model to account for the potential that when a covariate was missing it was possibly informative. The patients' average PS from the imputation were used for matching. The PS model for the probability of being a metformin+ insulin user is displayed in Appendix Table 2. Two variables were particularly strongly related to addition of insulin over sulfonylurea. Insulin as add on therapy increased relative to sulfonylureas over time as reflected by odds ratios for fiscal years 2009 to 2011 relative to 2007. Insulin as add on therapy increased with increasing baseline creatinine as reflected by odds ratios for 1.3. The PS model yielded a C statistic of 0.77. When used to facilitate matching, the success of the PS model is determined by the covariate balance achieved in the matched cohort. Table 1 in the paper demonstrates the standardized difference in means before and after propensity score matching. Indicating good balance after matching, all standardized differences have an absolute value  $< 0.1$  with many  $\leq 0.01$ . An important condition for propensity score methods is that every cohort member have a nontrivial probability of having received either of the study therapies. Our 1:5 matching procedure excluded metformin+ insulin patients for whom very few similar metformin+ sulfonylurea users existed. This corresponds fairly closely to the region of Appendix Figure 1 where the probability of metformin+ insulin use surpasses that of the much more prevalent metformin+ sulfonylurea use. It includes primarily patients who had very high HbA1c (median 11.8%) at the time of intensification. The optimal matching algorithm selects the cohort with the smallest average difference in propensity scores between exposure groups. The matching was performed on the log odds of the propensity scores with a caliper equivalent to 0.15 on the probability scale.

## Logistic regression model for the probability of intensifying with Metformin+ Insulin

| Characteristic                                     | Odds Ratio | 95% Confidence Intervals |       |
|----------------------------------------------------|------------|--------------------------|-------|
| <b>Comorbidities</b>                               |            |                          |       |
| Malignancy                                         | 1.184      | 1.147                    | 1.223 |
| Liver/ respiratory failure                         | 1.426      | 1.372                    | 1.483 |
| Congestive heart failure                           | 0.929      | 0.896                    | 0.964 |
| Cardiovascular disease                             | 1.080      | 1.055                    | 1.105 |
| Serious mental illness                             | 1.026      | 1.004                    | 1.048 |
| Cardiac valve disease                              | 0.917      | 0.866                    | 0.972 |
| Arrhythmia                                         | 0.873      | 0.845                    | 0.902 |
| Smoking                                            | 0.880      | 0.860                    | 0.900 |
| Chronic Obstructive Pulmonary Disease/ Asthma      | 1.094      | 1.068                    | 1.121 |
| HIV                                                | 1.722      | 1.545                    | 1.920 |
| Parkinsons                                         | 1.913      | 1.751                    | 2.091 |
| <b>Indicators of health care utilization</b>       |            |                          |       |
| Hospitalized in last year                          | 1.112      | 1.058                    | 1.169 |
| Recentness of hospitalization, months              | 1.055      | 1.026                    | 1.085 |
| Recentness of hospitalization, months <sup>2</sup> | 0.982      | 0.975                    | 0.989 |
| Recentness of hospitalization, months <sup>3</sup> | 1.002      | 1.002                    | 1.003 |
| Nursing Home encounter in last year                | 2.292      | 1.936                    | 2.715 |
| Outpatient Visits in past year                     | 1.011      | 1.009                    | 1.013 |
| Outpatient Visits in past year <sup>2</sup>        | 1.000      | 1.000                    | 1.000 |
| Outpatient Visits in past year <sup>3</sup>        | 1.000      | 1.000                    | 1.000 |
| Medicare encounters in last year                   | 1.539      | 1.504                    | 1.574 |
| Medicaid encounters in last year                   | 1.806      | 1.736                    | 1.879 |
| <b>Demographics</b>                                |            |                          |       |
| Race_Black                                         | 1.091      | 1.062                    | 1.120 |
| Race_Other                                         | 0.866      | 0.829                    | 0.906 |
| gender_female                                      | 1.338      | 1.283                    | 1.395 |
| Age                                                | 0.981      | 0.979                    | 0.983 |
| Age <sup>2</sup>                                   | 1.000      | 1.000                    | 1.000 |
| Age <sup>3</sup>                                   | 1.000      | 1.000                    | 1.000 |
| Fiscal Year 2002_2003                              | 0.974      | 0.923                    | 1.027 |
| Fiscal Year 2004                                   | 0.923      | 0.885                    | 0.962 |
| Fiscal Year 2005                                   | 0.953      | 0.919                    | 0.989 |
| Fiscal Year 2006                                   | 1.084      | 1.050                    | 1.119 |
| Fiscal Year 2008                                   | 1.684      | 1.632                    | 1.737 |
| Fiscal Year 2009                                   | 2.099      | 2.031                    | 2.169 |
| Fiscal Year 2010                                   | 2.401      | 2.315                    | 2.491 |
| Fiscal Year 2011                                   | 2.212      | 2.089                    | 2.342 |
| Time to intensification*, months                   | 0.987      | 0.986                    | 0.989 |
| Time to intensification, months <sup>2</sup>       | 1.000      | 1.000                    | 1.000 |

|                                              |       |       |       |
|----------------------------------------------|-------|-------|-------|
| Time to intensification, months <sup>3</sup> | 1.000 | 1.000 | 1.000 |
| <b>Clinical and laboratory</b>               |       |       |       |
| HbA1c                                        | 1.276 | 1.268 | 1.284 |
| HbA1c <sup>2</sup>                           | 1.060 | 1.057 | 1.062 |
| HbA1c <sup>3</sup>                           | 0.994 | 0.993 | 0.994 |
| Systolic Blood pressure                      | 1.004 | 1.003 | 1.004 |
| Systolic Blood pressure <sup>2</sup>         | 1.000 | 1.000 | 1.000 |
| Systolic Blood pressure <sup>3</sup>         | 1.000 | 1.000 | 1.000 |
| Diastolic Blood pressure                     | 0.985 | 0.984 | 0.986 |
| Diastolic Blood pressure <sup>2</sup>        | 1.000 | 1.000 | 1.000 |
| Diastolic Blood pressure <sup>3</sup>        | 1.000 | 1.000 | 1.000 |
| Body Mass Index                              | 0.981 | 0.979 | 0.983 |
| Body Mass Index <sup>2</sup>                 | 1.002 | 1.002 | 1.002 |
| Body Mass Index <sup>3</sup>                 | 1.000 | 1.000 | 1.000 |
| Low Density Lipoprotein                      | 0.997 | 0.997 | 0.998 |
| Low Density Lipoprotein <sup>2</sup>         | 1.000 | 1.000 | 1.000 |
| Low Density Lipoprotein <sup>3</sup>         | 1.000 | 1.000 | 1.000 |
| Creatinine                                   | 1.311 | 1.253 | 1.370 |
| Creatinine <sup>2</sup>                      | 1.062 | 0.980 | 1.151 |
| Creatinine <sup>3</sup>                      | 0.957 | 0.934 | 0.980 |
| Urine Protein Trace or 1+                    | 0.975 | 0.954 | 0.996 |
| Proteinuria present at 2+,3+,4+              | 1.097 | 1.054 | 1.143 |
| <b>Medications</b>                           |       |       |       |
| ACE Inhibitors or ARBs                       | 1.033 | 1.012 | 1.054 |
| Anti hypertensive medications                | 1.002 | 0.981 | 1.024 |
| Statin and non-statin lipid lowering agents  | 0.837 | 0.819 | 0.856 |
| Anti-arrhythmics, digoxin and inotropes      | 1.320 | 1.245 | 1.400 |
| Anticoagulant                                | 1.135 | 1.104 | 1.168 |
| Nitrates                                     | 1.062 | 1.031 | 1.095 |
| Aspirin                                      | 1.026 | 1.004 | 1.047 |
| Loop Diuretics                               | 1.543 | 1.501 | 1.587 |
| Antipsychotics                               | 1.244 | 1.207 | 1.282 |
| <b>Location of care</b>                      |       |       |       |
| Service network_a                            | 1.259 | 1.195 | 1.326 |
| Service network_b                            | 1.115 | 1.046 | 1.188 |
| Service network_c                            | 0.881 | 0.824 | 0.942 |
| Service network_d                            | 1.129 | 1.075 | 1.185 |
| Service network_e                            | 1.391 | 1.311 | 1.475 |
| Service network_f                            | 1.380 | 1.319 | 1.445 |
| Service network_g                            | 1.232 | 1.177 | 1.290 |
| Service network_h                            | 0.890 | 0.850 | 0.931 |
| Service network_i                            | 1.182 | 1.129 | 1.238 |
| Service network_j                            | 1.164 | 1.106 | 1.225 |
| Service network_k                            | 1.409 | 1.342 | 1.479 |
| Service network_l                            | 1.048 | 0.993 | 1.105 |

|                                                 |       |       |       |
|-------------------------------------------------|-------|-------|-------|
| Service network_m                               | 1.148 | 1.088 | 1.211 |
| Service network_n                               | 1.290 | 1.227 | 1.357 |
| Service network_o                               | 1.325 | 1.256 | 1.398 |
| Service network_p                               | 1.178 | 1.108 | 1.252 |
| Service network_q                               | 1.566 | 1.491 | 1.645 |
| Service network_r                               | 0.816 | 0.767 | 0.867 |
| Service network_s                               | 0.945 | 0.896 | 0.997 |
| Service network_t                               | 1.137 | 1.082 | 1.195 |
| <b>Indicators of Missing covariates imputed</b> |       |       |       |
| HbA1c missing                                   | 1.301 | 1.260 | 1.343 |
| Blood pressure missing                          | 0.924 | 0.860 | 0.992 |
| BMI missing                                     | 1.184 | 1.110 | 1.263 |
| LDL missing                                     | 1.202 | 1.170 | 1.235 |
| Creatinine missing                              | 1.021 | 0.991 | 1.052 |
| Urine protein testing missing                   | 0.991 | 0.970 | 1.012 |
| Race missing                                    | 1.101 | 1.063 | 1.140 |

---

\* Time to treatment intensification represents the time on metformin monotherapy. Because patients were free of all hypoglycemic medications for 180 days prior to starting metformin, time on metformin monotherapy approximates the length of time patients have had diabetes requiring treatment.



Appendix Table 3: Full Table of Patient Characteristics

| <b>Characteristics</b>                                    | <b>Full Cohort</b>                              |                                          |                      | <b>Propensity matched Cohort</b>               |                                          |                      |
|-----------------------------------------------------------|-------------------------------------------------|------------------------------------------|----------------------|------------------------------------------------|------------------------------------------|----------------------|
|                                                           | <b>Metformin+<br/>Sulfonylurea<br/>N=39,990</b> | <b>Metformin+<br/>Insulin<br/>N=2948</b> | <b>St.<br/>Diff†</b> | <b>Metformin+<br/>Sulfonylurea<br/>N=12180</b> | <b>Metformin+<br/>Insulin<br/>N=2436</b> | <b>St.<br/>Diff†</b> |
| <b>Age*</b>                                               | 61 (56, 69)                                     | 60 (54, 67)                              | -0.13                | 60 (54, 68)                                    | 60 (55, 68)                              | 0.02                 |
| <b>Male N (%)</b>                                         | 38345 (96)                                      | 2787 (95)                                | -0.07                | 11521 (95)                                     | 2315 (95)                                | 0.02                 |
| <b>Race, N (%)</b>                                        |                                                 |                                          |                      |                                                |                                          |                      |
| White                                                     | 29458 (74)                                      | 2023 (69)                                | -0.11                | 8612 (71)                                      | 1726 (71)                                | 0.00                 |
| Black                                                     | 5161 (13)                                       | 571 (19)                                 | 0.19                 | 2028 (17)                                      | 400 (16)                                 | -0.01                |
| Hispanic/ Other                                           | 1832 (5)                                        | 124 (4)                                  | -0.02                | 512 (4)                                        | 111 (5)                                  | 0.02                 |
| Missing                                                   | 3539 (9)                                        | 230 (8)                                  | -0.04                | 1028 (8)                                       | 199 (8)                                  | -0.01                |
| <b>Time to intensification‡*</b>                          | 18 (7, 34)                                      | 14 (5, 30)                               | -0.13                | 14 (6, 31)                                     | 14 (5, 30)                               | -0.01                |
| <b>HbA1c, %*</b>                                          | 7.6 (7.0, 8.6)                                  | 8.5 (7.0,10.7)                           | 0.54                 | 8.1 (7.2, 9.9)                                 | 8.1 (6.9,9.9)                            | -0.07                |
| Missing, N (%)                                            | 5470 (14)                                       | 573 (19)                                 | 0.17                 | 2315 (19)                                      | 470 (19)                                 | 0.01                 |
| <b>Low Density Lipoprotein<br/>mg/dL*</b>                 | 87 (70, 110)                                    | 87 (67, 113)                             | -0.02                | 86 (67, 110)                                   | 87 (67, 113)                             | 0.02                 |
| Missing, N (%)                                            | 8492 (21)                                       | 851 (29)                                 | 0.19                 | 3408 (28)                                      | 694 (28)                                 | 0.01                 |
| <b>Creatinine mg/dL*</b>                                  | 1.0 (0.9, 1.1)                                  | 1.0 (0.9, 1.2)                           | 0.04                 | 1.0 (0.9, 1.1)                                 | 1.0 (0.9, 1.2)                           | 0.00                 |
| <b>Glomerular filtration rate<br/>ml/min*</b>             | 81 (70, 95)                                     | 82 (69, 100)                             | 0.06                 | 82 (70, 98)                                    | 82 (70, 98)                              | 0.01                 |
| Missing, N (%)                                            | 5978 (15)                                       | 555 (19)                                 | 0.11                 | 2372 (19)                                      | 468 (19)                                 | -0.01                |
| <b>Proteinuria, N(%)</b>                                  | 20909 (52)                                      | 1489 (50)                                |                      | 6044 (50)                                      | 1214 (50)                                |                      |
| negative                                                  |                                                 |                                          |                      |                                                |                                          |                      |
| trace through 4+                                          | 7468 (19)                                       | 615 (21)                                 | 0.01                 | 2534 (20)                                      | 503 (20)                                 | 0.00                 |
| Missing, N (%)                                            | 11613 (29)                                      | 844 (29)                                 | 0.01                 | 3602 (30)                                      | 719 (30)                                 | 0.00                 |
| <b>Systolic Blood pressure<br/>mm/Hg*</b>                 | 132 (122, 143)                                  | 131 (120,<br>142)                        | -0.08                | 131 (120, 143)                                 | 131 (120, 142)                           | 0.01                 |
| <b>Diastolic Blood pressure<br/>mm/Hg*</b>                | 77 (70, 84)                                     | 76 (68, 83)                              | -0.07                | 76 (68, 83)                                    | 76 (68, 84)                              | -0.01                |
| Missing, N (%)                                            | 1689 (4)                                        | 187 (6)                                  | 0.10                 | 788 (6)                                        | 159 (7)                                  | 0.00                 |
| <b>Body Mass Index<br/>(kilograms/meter<sup>2</sup>)*</b> | 32.5(28.9,36.7)                                 | 32.4 (28.3,<br>37.0)                     | -0.04                | 32.3(28.6,37.0)                                | 32.6(28.4,37.1)                          | 0.00                 |
| Missing, N (%)                                            | 2098 (5)                                        | 236 (8)                                  | 0.12                 | 961 (8)                                        | 191 (8)                                  | 0.00                 |
| <b>Baseline Co-morbidities<br/>N(%)§</b>                  |                                                 |                                          |                      |                                                |                                          |                      |
| Malignancy                                                | 3059 (8)                                        | 273 (9)                                  | 0.06                 | 1115 (9)                                       | 223 (9)                                  | 0.00                 |
| Liver/ respiratory failure                                | 1156 (3)                                        | 213 (7)                                  | 0.25                 | 668 (5)                                        | 117 (5)                                  | -0.04                |
| HIV                                                       | 125 (0.3)                                       | 24 (0.8)                                 | 0.09                 | 69 (0.6)                                       | 14 (0.6)                                 | 0.00                 |
| Congestive heart failure                                  | 2222 (6)                                        | 306 (10)                                 | 0.21                 | 1053 (9)                                       | 209 (9)                                  | 0.00                 |
| Cardiovascular disease                                    | 11849 (30)                                      | 1056 (36)                                | 0.14                 | 4125 (34)                                      | 825 (34)                                 | 0.00                 |
| Serious mental illness                                    | 11162 (28)                                      | 1028 (35)                                | 0.15                 | 3878 (32)                                      | 768 (32)                                 | -0.01                |
| Smoking                                                   | 7719 (19)                                       | 685 (23)                                 | 0.10                 | 2581 (21)                                      | 528 (22)                                 | 0.01                 |
| Chronic Obstructive<br>Pulmonary Disease/<br>Asthma       | 6114 (15)                                       | 634 (22)                                 | 0.17                 | 2378 (20)                                      | 481 (20)                                 | 0.01                 |
| Cardiac valve disease                                     | 766 (2)                                         | 84 (3)                                   | 0.07                 | 296 (2)                                        | 62 (2)                                   | 0.01                 |
| Arrhythmia                                                | 3449 (9)                                        | 338 (11)                                 | 0.10                 | 1274 (10)                                      | 255 (10)                                 | 0.00                 |
| Parkinson's                                               | 192 (0.5)                                       | 36 (1)                                   | 0.10                 | 107 (0.9)                                      | 21 (0.9)                                 | 0.00                 |
| <b>Year N (%)</b>                                         |                                                 |                                          | 0.14                 |                                                |                                          | -0.03                |
| 2002-03                                                   | 1354 (3)                                        | 104 (3)                                  |                      | 474 (4)                                        | 93 (4)                                   |                      |
| 2004                                                      | 3047 (8)                                        | 191 (6)                                  |                      | 837 (7)                                        | 171 (7)                                  |                      |
| 2005                                                      | 4698 (12)                                       | 282 (10)                                 |                      | 1171 (10)                                      | 250 (10)                                 |                      |
| 2006                                                      | 6737 (17)                                       | 450 (15)                                 |                      | 1848 (15)                                      | 379 (16)                                 |                      |
| 2007                                                      | 7659 (19)                                       | 451 (15)                                 |                      | 1895 (16)                                      | 401 (16)                                 |                      |

|                                                      |            |           |       |           |           |       |
|------------------------------------------------------|------------|-----------|-------|-----------|-----------|-------|
| 2008                                                 | 6544 (16)  | 546 (19)  |       | 2209 (18) | 428 (18)  |       |
| 2009                                                 | 5162 (13)  | 475 (16)  |       | 1915 (16) | 369 (15)  |       |
| 2010                                                 | 3691 (9)   | 353 (12)  |       | 1463 (12) | 275 (11)  |       |
| 2011                                                 | 1098 (3)   | 96 (3)    |       | 368 (3)   | 70 (3)    |       |
| <b>Use of Medications N (%)</b>                      |            |           |       |           |           |       |
| ACE Inhibitors or ARBs                               | 28685 (72) | 2072 (70) | -0.03 | 8576 (70) | 1727 (71) | 0.01  |
| Anti hypertensive medications                        | 28945 (72) | 2147 (73) | 0.01  | 8894 (73) | 1762 (72) | -0.02 |
| Statin and non-statin lipid lowering agents          | 32206 (81) | 2210 (75) | -0.14 | 9250 (76) | 1858 (76) | 0.01  |
| Anti-arrhythmics, digoxin and other inotropes        | 569 (1)    | 78 (3)    | 0.10  | 274 (2)   | 57 (2)    | 0.01  |
| Anticoagulants, platelet inhibitors                  | 4603 (12)  | 482 (16)  | 0.15  | 1849 (15) | 363 (15)  | -0.01 |
| Nitrates                                             | 3821 (10)  | 376 (13)  | 0.11  | 1472 (12) | 297 (12)  | 0.00  |
| Aspirin                                              | 9441 (24)  | 872 (30)  | 0.14  | 3411 (28) | 666 (27)  | -0.02 |
| Loop Diuretics                                       | 4204 (11)  | 545 (18)  | 0.25  | 2022 (17) | 395 (16)  | -0.01 |
| Antipsychotics                                       | 3254 (8)   | 405 (14)  | 0.20  | 1436 (12) | 279 (11)  | -0.01 |
| <b>Indicators of health care utilization N(%)</b>    |            |           |       |           |           |       |
| Hospitalized in last year                            | 5692 (14)  | 1023 (35) | 0.57  | 3274 (27) | 631 (26)  | -0.03 |
| Hospitalized in the 90 days prior to intensification | 2286 (6)   | 679 (23)  | 0.06  | 1732 (14) | 334 (14)  | -0.02 |
| Nursing Home encounter in last year                  | 38 (0.1)   | 11 (0.4)  | 0.08  | 24 (0.2)  | 4 (0.2)   | -0.01 |
| Outpatient Visits in past year                       | 6 (4, 10)  | 7 (4, 12) | 0.15  | 7 (4, 12) | 7 (4, 12) | -0.03 |
| Medicare use in last year                            | 11349 (28) | 1066 (36) | 0.17  | 4191 (34) | 843 (35)  | 0.00  |
| Medicaid use in last year                            | 1046 (3)   | 202 (7)   | 0.25  | 590 (5)   | 122 (5)   | 0.01  |

\* Median and interquartile range reported ACEI = angiotensin-converting enzyme inhibitor; ARB = angiotensin-receptor blocker

†Standardized differences are the absolute difference in means or percent divided by an evenly weighted pooled standard deviation, or the difference between groups in number of standard deviations. In the matched cohort all standardized differences were statistically insignificant except HbA1c at p=0.05.

‡Time to treatment intensification represents the median number of months on metformin monotherapy. It is an approximation of diabetes duration since patients were free of all hypoglycemic medications for 180 days prior to starting metformin.

§Definitions of comorbidities available in Supplemental Table 1

Appendix Table 4: Characteristics of cohort of patients on metformin monotherapy initiating sulfonylurea or insulin (follow-up beginning at intensification and continuing through the first 180 days), before and after propensity score matching

| <b>Characteristics</b>                              | <b>Full Cohort</b>                             |                                          |                  | <b>Propensity matched Cohort</b>               |                                          |                  |
|-----------------------------------------------------|------------------------------------------------|------------------------------------------|------------------|------------------------------------------------|------------------------------------------|------------------|
|                                                     | <b>Metformin+<br/>Sulfonylurea<br/>N=62472</b> | <b>Metformin+<br/>Insulin<br/>N=5647</b> | <b>St. Diff†</b> | <b>Metformin+<br/>Sulfonylurea<br/>N=23965</b> | <b>Metformin+<br/>Insulin<br/>N=4793</b> | <b>St. Diff‡</b> |
| <b>Age *</b>                                        | 62 (57, 71)                                    | 62 (55, 70)                              | -0.08            | 62 (55, 71)                                    | 62 (56, 71)                              | 0.00             |
| <b>Male, %</b>                                      | 96                                             | 95                                       | -0.04            | 95                                             | 95                                       | 0.01             |
| <b>Race %</b>                                       |                                                |                                          |                  |                                                |                                          |                  |
| White                                               | 74                                             | 70                                       | -0.10            | 71                                             | 71                                       | 0.01             |
| Black                                               | 14                                             | 19                                       | 0.16             | 17                                             | 17                                       | -0.00            |
| Hispanic/ Other                                     | 5                                              | 5                                        | 0.00             | 5                                              | 5                                        | 0.01             |
| Missing                                             | 8                                              | 7                                        | -0.04            | 7                                              | 7                                        | -0.01            |
| <b>Time to intensification, months‡*</b>            | 16 (7, 33)                                     | 13 (5, 30)                               | -0.10            | 14 (5, 31)                                     | 14 (5, 31)                               | -0.01            |
| <b>HbA1c, % *</b>                                   | 7.5 (6.8, 8.4)                                 | 7.8 (6.6, 10.1)                          | 0.41             | 7.9 (6.9, 9.6)                                 | 7.7 (6.6, 9.6)                           | -0.06            |
| Missing, %                                          | 15                                             | 21                                       |                  | 21                                             | 21                                       | -0.02            |
| <b>Low Density Lipoprotein mg/dL*</b>               | 88 (69, 110)                                   | 87 (66, 112)                             | -0.03            | 87 (67, 112)                                   | 87 (67, 112)                             | 0.01             |
| Missing, %                                          | 23                                             | 31                                       | 0.16             | 30                                             | 30                                       | -0.01            |
| <b>Creatinine mg/dL*</b>                            | 1.0 (0.9, 1.1)                                 | 1.0 (0.9, 1.1)                           | -0.04            | 1.0 (0.9, 1.1)                                 | 1.0 (0.9, 1.1)                           | 0.00             |
| <b>Glomerular filtration rate ml/min*</b>           | 79(64, 93)                                     | 81 (66, 98)                              | 0.14             | 81 (66, 97)                                    | 80 (66, 96)                              | -0.00            |
| Missing, %                                          | 16                                             | 20                                       | 0.11             | 21                                             | 20                                       | -0.03            |
| <b>Proteinuria, % negative</b>                      | 52                                             | 49                                       | 0.07             | 49                                             | 49                                       | 0.00             |
| trace through 4+                                    | 19                                             | 23                                       | 0.07             | 22                                             | 22                                       | 0.00             |
| Missing %                                           | 29                                             | 28                                       | -0.02            | 29                                             | 29                                       | -0.01            |
| <b>Systolic Blood pressure mm/Hg*</b>               | 132 (121, 142)                                 | 130 (119, 142)                           | -0.09            | 130 (120, 142)                                 | 130 (120,142)                            | -0.01            |
| <b>Diastolic Blood pressure mm/Hg, median (IQR)</b> | 76 (68, 83)                                    | 75 (67, 83)                              | -0.06            | 75 (67, 82)                                    | 75 (67, 83)                              | -0.01            |
| Missing, %                                          | 5                                              | 9                                        | 0.15             | 9                                              | 8                                        | -0.03            |
| <b>Body Mass Index (kg/m<sup>2</sup>)*</b>          | 32.0(28.4,36.3)                                | 31.4(27.3,36.0)                          | -0.10            | 31.7(27.9,36.3)                                | 31.7(27.7,36.3)                          | -0.01            |
| Missing %                                           | 6                                              | 12                                       | 0.17             | 10                                             | 10                                       | -0.03            |
| <b>Co-morbidities %§</b>                            |                                                |                                          |                  |                                                |                                          |                  |
| Malignancy                                          | 9                                              | 13                                       | 0.12             | 12                                             | 12                                       | 0.01             |
| Liver/ respiratory failure                          | 4                                              | 11                                       | 0.35             | 7                                              | 7                                        | 0.03             |
| HIV                                                 | 0.4                                            | 0.8                                      | 0.07             | 0.6                                            | 0.6                                      | 0.00             |
| Congestive heart failure                            | 8                                              | 14                                       | 0.24             | 12                                             | 13                                       | 0.04             |
| Cardiovascular disease                              | 33                                             | 41                                       | 0.18             | 40                                             | 40                                       | 0.02             |
| Serious mental illness                              | 27                                             | 36                                       | 0.20             | 33                                             | 33                                       | 0.00             |
| Smoking                                             | 19                                             | 24                                       | 0.13             | 22                                             | 22                                       | 0.01             |
| Chronic Obstructive Pulmonary Disease/ Asthma       | 17                                             | 25                                       | 0.22             | 22                                             | 22                                       | 0.01             |
| Cardiac valve disease                               | 2                                              | 3                                        | 0.07             | 3                                              | 3                                        | 0.02             |
| Arrhythmia                                          | 11                                             | 15                                       | 0.15             | 14                                             | 15                                       | 0.02             |
| Parkinson's                                         | 0.5                                            | 1                                        | 0.10             | 1                                              | 1                                        | 0.00             |
| <b>Year N (%)</b>                                   |                                                |                                          |                  |                                                |                                          |                  |
| 2002-03                                             | 4                                              | 3                                        | -0.03            | 3                                              | 4                                        | 0.02             |
| 2004                                                | 8                                              | 6                                        | -0.07            | 6                                              | 7                                        | 0.01             |
| 2005                                                | 12                                             | 10                                       | -0.06            | 10                                             | 10                                       | 0.02             |
| 2006                                                | 17                                             | 15                                       | -0.04            | 15                                             | 15                                       | 0.00             |
| 2007                                                | 19                                             | 16                                       | -0.07            | 16                                             | 16                                       | 0.00             |
| 2008                                                | 15                                             | 18                                       | 0.08             | 17                                             | 17                                       | -0.01            |
| 2009                                                | 12                                             | 14                                       | 0.08             | 14                                             | 14                                       | -0.00            |
| 2010                                                | 8                                              | 10                                       | 0.07             | 11                                             | 10                                       | -0.03            |
| 2011                                                | 6                                              | 7                                        | 0.05             | 7                                              | 7                                        | -0.01            |
| <b>Use of Medications %</b>                         |                                                |                                          |                  |                                                |                                          |                  |

|                                                |           |           |       |           |           |       |
|------------------------------------------------|-----------|-----------|-------|-----------|-----------|-------|
| ACE Inhibitors/ARBs                            | 73        | 71        | -0.05 | 71        | 71        | 0.02  |
| Anti hypertensive medications                  | 76        | 76        | 0.00  | 75        | 75        | 0.00  |
| Statin and non-statin lipid lowering agents    | 81        | 75        | -0.15 | 76        | 76        | 0.00  |
| Anti-arrhythmics, digoxin                      | 7         | 10        | 0.14  | 9         | 9         | 0.00  |
| Anticoagulants, platelet inhibitors            | 14        | 21        | 0.19  | 19        | 19        | 0.01  |
| Nitrates                                       | 12        | 16        | 0.11  | 15        | 15        | 0.01  |
| Aspirin                                        | 23        | 30        | 0.16  | 28        | 28        | 0.01  |
| Loop Diuretics                                 | 14        | 24        | 0.29  | 21        | 21        | 0.01  |
| Antipsychotics                                 | 9         | 14        | 0.20  | 12        | 12        | -0.00 |
| <b>Indicators of health care utilization %</b> |           |           |       |           |           |       |
| Hospitalized in last year                      | 17        | 44        | 0.69  | 33        | 35        | 0.06  |
| Hospitalized in prior 90 days                  | 8         | 32        | 0.84  | 20        | 24        | 0.10  |
| Nursing Home encounter                         | 0.1       | 0.7       | 0.15  | 0.3       | 0.3       | -0.01 |
| Outpatient Visits                              | 6 (4, 11) | 7 (4, 13) | 0.21  | 7 (4, 12) | 7 (4, 12) | 0.01  |
| Medicare use                                   | 32        | 41        | 0.20  | 39        | 39        | 0.00  |
| Medicaid use                                   | 3         | 8         | 0.32  | 5         | 6         | 0.02  |

\* Median and interquartile range reported ACEI = angiotensin-converting enzyme inhibitor; ARB = angiotensin-receptor blocker

† Standardized differences are the absolute difference in means or percent divided by an evenly weighted pooled standard deviation, or the difference between groups in number of standard deviations. All P values in the unmatched cohort demonstrated statistically significant differences at  $p < 0.001$ . In the matched cohort all standardized differences were statistically insignificant except HbA1c, congestive heart failure, and past history of hospitalization at  $p < 0.05$ .

‡ Time to treatment intensification represents the time on metformin monotherapy. It represents an approximation of the duration of diabetes since patients were free of all hypoglycemic medications for 180 days prior to starting metformin

§ Definitions of comorbidities available in Supplemental Table 1

Appendix Table 5: Event rates and adjusted hazard with 95% confidence intervals for risk of first hypoglycemic event and recurrent hypoglycemic event using sensitivity analysis.

| <b>Sensitivity Analyses</b>                                                        | <b>Metformin+ Sulfonylurea</b> | <b>Metformin+ Insulin</b> |
|------------------------------------------------------------------------------------|--------------------------------|---------------------------|
| <b>Sensitivity to outcome definitions, N at risk</b>                               | 12,180                         | 2,436                     |
| <b>Hypoglycemia hospitalization, emergency visit or blood glucose &lt; 50mg/dl</b> |                                |                           |
| <i>Composite hypoglycemic first event*</i>                                         | 231                            | 65                        |
| Person Years                                                                       | 19274                          | 4005                      |
| Unadjusted Rate/1000 person-years                                                  | 12 (10.5, 13.6)                | 16.2 (12.7, 20.6)         |
| Adjusted Hazard Ratio† (95% CI)                                                    | Reference                      | <b>1.38 (1.04, 1.83)</b>  |
| <i>Composite hypoglycemic recurrent events</i>                                     | 275                            | 78                        |
| Person Years                                                                       | 19593                          | 4070                      |
| Unadjusted Rate/1000 person-years                                                  | 14.0 (12.5, 15.8)              | 19.2 (15.4, 23.9)         |
| Adjusted Hazard Ratio † (95% CI)                                                   | Reference                      | <b>1.42 (1.05, 1.91)</b>  |
| <i>Persistent Exposure Not Required</i>                                            |                                |                           |
| <i>Composite hypoglycemic first event*</i>                                         | 561                            | 148                       |
| Person Years                                                                       | 37155                          | 7328                      |
| Unadjusted Rate/1000 person-years                                                  | 15.1 (13.9, 16.4)              | 20.2 (17.2, 23.7)         |
| Adjusted Hazard Ratio† (95% CI)                                                    | Reference                      | <b>1.38 (1.15, 1.66)</b>  |
| <i>Composite hypoglycemic recurrent events</i>                                     | 733                            | 240                       |
| Person Years                                                                       | 38248                          | 7654                      |
| Unadjusted Rate/1000 person-years                                                  | 19.2 (17.8, 20.6)              | 31.4 (27.7, 35.5)         |
| Adjusted Hazard Ratio † (95% CI)                                                   | Reference                      | <b>1.71 (1.35, 2.17)</b>  |
| <b>Hospitalization or emergency department visit*</b>                              |                                |                           |
| <i>Hypoglycemic first event</i>                                                    | 114                            | 27                        |
| Person Years                                                                       | 19446                          | 4043                      |
| Unadjusted Rate/1000 person-years                                                  | 5.9 (4.9, 7.0)                 | 6.7 (4.6, 9.7)            |
| Adjusted Hazard Ratio† (95% CI)                                                    | Reference                      | 1.19 (0.77, 1.83)         |
| <i>Hypoglycemic recurrent events</i>                                               | 125                            | 32                        |
| Person Years                                                                       | 19593                          | 4070                      |
| Unadjusted Rate/1000 person-years                                                  | 6.4 (5.4, 7.6)                 | 7.9 (5.6, 11.1)           |
| Adjusted Hazard Ratio† (95% CI)                                                    | Reference                      | 1.29 (0.83, 2.02)         |
| <i>Persistent Exposure Not Required</i>                                            |                                |                           |
| <i>Hypoglycemic first event</i>                                                    | 313                            | 83                        |
| Person Years                                                                       | 37661                          | 7486                      |
| Unadjusted Rate/1 000 person-years                                                 | 8.3 (7.4, 9.3)                 | 11.1 (9.0, 13.7)          |

|                                                                   |                   |                          |
|-------------------------------------------------------------------|-------------------|--------------------------|
| Adjusted Hazard Ratio† (95% CI)                                   | Reference         | <b>1.41 (1.10, 1.80)</b> |
| <i>Hypoglycemic recurrent events</i>                              | 377               | 116                      |
| Person Years                                                      | 38248             | 7654                     |
| Unadjusted Rate/1000 person-years                                 | 9.9 (8.9, 10.9)   | 15.2 (12.7, 18.1)        |
| Adjusted Hazard Ratio† (95% CI)                                   | Reference         | <b>1.62 (1.21, 2.17)</b> |
| <b><i>Sensitivity to exposure definitions</i></b>                 |                   |                          |
| <b><i>First 180 days of use ‡</i></b> N at risk in matched cohort | 23,965            | 4,793                    |
| <i>Composite hypoglycemic first event</i>                         | 472               | 1.36130                  |
| Person Years                                                      | 11601             | 2282                     |
| Unadjusted Rate/1000 person-years                                 | 40.7 (37.2, 44.4) | 57.0 (48.2, 67.2)        |
| Adjusted Hazard Ratio† (95% CI)                                   | Reference         | <b>1.36 (1.12, 1.66)</b> |
| <i>Composite hypoglycemic recurrent events</i>                    | 525               | 147                      |
| Person Years                                                      | 11702             | 2313                     |
| Unadjusted Rate/1000 person-years                                 | 44.9 (41.3, 48.8) | 63.6 (54.3, 74.2)        |
| Adjusted Hazard Ratio † (95% CI)                                  | Reference         | <b>1.37 (1.12, 1.69)</b> |

\* Analysis requires persistence on metformin; patients are censored after 90 days without metformin in hand. Persistent Exposure not required analysis does not require persistence on regimen or refills within 90 days. Patients can add another regimen or stop.

† Adjusted analyses derived from Cox proportional hazards model for time to outcome for matched cohort, adjusted for all baseline covariates included in propensity score model except for service network of care

‡ Analysis checks for susceptible patients who intensify regimen and are at highest risk of adverse event in the first 180 days of use when exposure status remains uncertain. All potential patients start follow-up at treatment intensification and followup time ends at 180 days post intensification. Analyses do not require persistence on regimen or refills within 90 days. Patients can add another regimen or stop.

Appendix table 6: Event rates and adjusted hazard with 95% confidence intervals for risk of first hypoglycemic event and recurrent hypoglycemic event by subgroups.

| <b><i>Persistent Exposure required*</i></b>                                | <b><i>Metformin+<br/>Sulfonylurea</i></b> | <b><i>Metformin+<br/>Insulin</i></b> |
|----------------------------------------------------------------------------|-------------------------------------------|--------------------------------------|
| <b>Age less than 65 years (N)</b>                                          | 8270                                      | 1654                                 |
| <i>Composite hypoglycemic first event</i>                                  | 300                                       | 73                                   |
| Person Years                                                               | 13023                                     | 2815                                 |
| Unadjusted Rate/1000 person-years                                          | 23.0 (20.6, 25.8)                         | 25.9 (20.7, 32.5)                    |
| Adjusted Hazard Ratio† (95% CI)                                            | Reference                                 | 1.17 (0.90, 1.52)                    |
| <i>Composite hypoglycemic recurrent events</i>                             | 374                                       | 97                                   |
| Person Years                                                               | 13491                                     | 2912                                 |
| Unadjusted Rate/1000 person-years                                          | 27.7 (25.1, 30.6)                         | 33.3 (27.4, 40.5)                    |
| Adjusted Hazard Ratio † (95% CI)                                           | Reference                                 | 1.26 (0.95, 1.67)                    |
| <b>Age 65 years and older (N)</b>                                          | 3910                                      | 782                                  |
| <i>Composite hypoglycemic first event</i>                                  | 166                                       | 48                                   |
| Person Years                                                               | 5899                                      | 1104                                 |
| Unadjusted Rate/1000 person-years                                          | 28.1 (24.2, 32.7)                         | 43.4 (32.9, 57.2)                    |
| Adjusted Hazard Ratio† (95% CI)                                            | Reference                                 | <b>1.49 (1.06, 2.10)</b>             |
| <i>Composite hypoglycemic recurrent events</i>                             | 211                                       | 62                                   |
| Person Years                                                               | 6101                                      | 1158                                 |
| Unadjusted Rate/1000 person-years                                          | 34.6 (30.3, 39.5)                         | 53.5 (42.0, 68.0)                    |
| Adjusted Hazard Ratio † (95% CI)                                           | Reference                                 | <b>1.56 (1.10, 2.23)</b>             |
| <b>Estimated glomerular filtration rate <math>\geq</math>60 ml/min (N)</b> | 8682                                      | 1759                                 |
| <i>Composite hypoglycemic first event</i>                                  | 328                                       | 84                                   |
| Person Years                                                               | 13807                                     | 2903                                 |
| Unadjusted Rate/1000 person-years                                          | 23.8 (21.3, 26.4)                         | 28.9 (23.4, 35.7)                    |
| Adjusted Hazard Ratio† (95% CI)                                            | Reference                                 | 1.22 (0.95, 1.56)                    |
| <i>Composite hypoglycemic recurrent events</i>                             | 407                                       | 110                                  |
| Person Years                                                               | 14289                                     | 2998                                 |
| Unadjusted Rate/1000 person-years                                          | 28.5 (25.9, 31.3)                         | 36.7 (30.5, 44.0)                    |
| Adjusted Hazard Ratio † (95% CI)                                           | Reference                                 | <b>1.33 (1.03, 1.72)</b>             |
| <b>Estimated glomerular filtration rate &lt;60 ml/min (N)</b>              | 3498                                      | 677                                  |
| <i>Composite hypoglycemic first event</i>                                  | 138                                       | 37                                   |
| Person Years                                                               | 5115                                      | 1016                                 |

|                                                               |                   |                          |
|---------------------------------------------------------------|-------------------|--------------------------|
| Unadjusted Rate/1000 person-years                             | 27.0 (22.9, 31.8) | 36.4 (26.5, 49.8)        |
| Adjusted Hazard Ratio† (95% CI)                               | Reference         | 1.44 (0.98, 2.11)        |
| <i>Composite hypoglycemic recurrent events</i>                | 178               | 49                       |
| Person Years                                                  | 5303              | 1071                     |
| Unadjusted Rate/1000 person-years                             | 33.6 (29.0, 38.8) | 45.8 (34.8, 60.0)        |
| Adjusted Hazard Ratio † (95% CI)                              | Reference         | <b>1.50 (1.01, 2.23)</b> |
| <b>Not hospitalized in 90 days before intensification (N)</b> | 10448             | 2102                     |
| <i>Composite hypoglycemic first event</i>                     | 370               | 105                      |
| Person Years                                                  | 16323             | 3402                     |
| Unadjusted Rate/1000 person-years                             | 22.7 (20.5, 25.1) | 30.9 (25.6, 37.2)        |
| Adjusted Hazard Ratio† (95% CI)                               | Reference         | <b>1.41 (1.13, 1.77)</b> |
| <i>Composite hypoglycemic recurrent events</i>                | 470               | 133                      |
| Person Years                                                  | 16847             | 3544                     |
| Unadjusted Rate/1000 person-years                             | 27.9 (25.5, 30.5) | 37.5 (31.8, 44.3)        |
| Adjusted Hazard Ratio † (95% CI)                              | Reference         | <b>1.44 (1.14, 1.83)</b> |
| <b>Hospitalized in 90 days before intensification (N)</b>     | 1732              | 334                      |
| <i>Composite hypoglycemic first event</i>                     | 96                | 16                       |
| Person Years                                                  | 2599              | 516                      |
| Unadjusted Rate/1000 person-years                             | 36.9 (30.3, 44.9) | 31.0 (19.2, 49.8)        |
| Adjusted Hazard Ratio† (95% CI)                               | Reference         | 0.82 (0.46, 1.46)        |
| <i>Composite hypoglycemic recurrent events</i>                | 115               | 26                       |
| Person Years                                                  | 2746              | 526                      |
| Unadjusted Rate/1000 person-years                             | 41.9 (35.0, 50.0) | 49.4 (34.0, 71.4)        |
| Adjusted Hazard Ratio † (95% CI)                              | Reference         | 1.17 (0.66, 2.06)        |
| <b>Glyburide as reference (N)</b>                             | 5006              | 2436                     |
| <i>Composite hypoglycemic first event</i>                     | 228               | 121                      |
| Person Years                                                  | 8443              | 3919                     |
| Unadjusted Rate/1000 person-years                             | 27.0 (23.8, 30.9) | 30.9 (25.9, 36.8)        |
| Adjusted Hazard Ratio† (95% CI)                               | Reference         | 1.19 (0.95, 1.49)        |
| <i>Composite hypoglycemic recurrent events</i>                | 290               | 159                      |
| Person Years                                                  | 8796              | 4070                     |
| Unadjusted Rate/1000 person-years                             | 33.0 (29.4, 36.9) | 39.1 (33.5, 45.5)        |
| Adjusted Hazard Ratio † (95% CI)                              | Reference         | <b>1.28 (1.00, 1.63)</b> |
| <b>Glipizide/ Glimepiride as reference (N)</b>                | 7174              | 2436                     |



|                                                |                   |                          |
|------------------------------------------------|-------------------|--------------------------|
| <i>Composite hypoglycemic first event</i>      | 238               | 121                      |
| Person Years                                   | 10479             | 3919                     |
| Unadjusted Rate/1000 person-years              | 22.7 (20.0, 25.7) | 30.9 (25.9, 36.8)        |
| Adjusted Hazard Ratio† (95% CI)                | Reference         | <b>1.40 (1.12, 1.75)</b> |
| <i>Composite hypoglycemic recurrent events</i> | 295               | 159                      |
| Person Years                                   | 10797             | 4070                     |
| Unadjusted Rate/1000 person-years              | 27.3 (24.4, 30.6) | 39.1 (33.5, 45.5)        |
| Adjusted Hazard Ratio † (95% CI)               | Reference         | <b>1.49 (1.18, 1.63)</b> |

\* Analysis requires persistence on metformin; patients are censored after 90 days without metformin in hand.

† Adjusted analyses derived from Cox proportional hazards model for time to outcome for matched cohort, adjusted for all baseline covariates included in propensity score model except for service network of care

Appendix Figure 1: Study design Schematic

**Main analysis:**

**Persistent exposure required :** Gaps (red bars) of up to 90 days are allowed in order to refill the intensified regimen. Patients are censored at addition of third drug or no medication refills within 90 days

**Sensitivity analyses:**

**Persistent exposure not required:** In this approach patients are analyzed as users of their intensified regimen regardless of switching, stopping or additions (akin to an intent to treat analysis)

**Early effects of intensification:** Follow-up begins at t1 and is restricted to the first 180 day period (labeled indeterminate time on graphic)

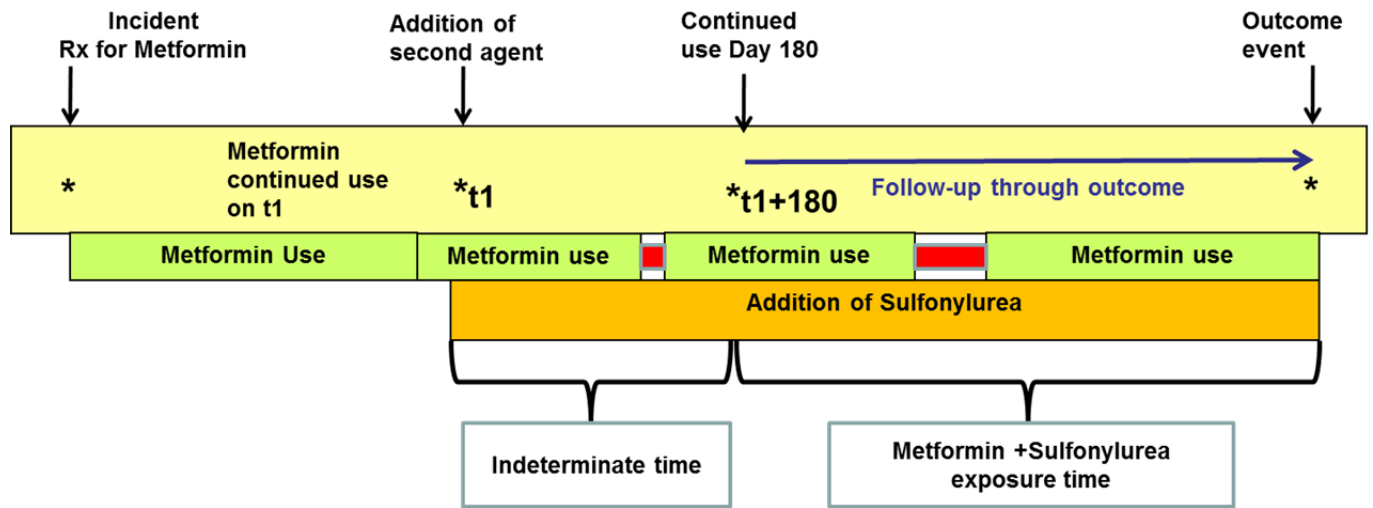

Appendix Figure 2: Distribution of propensity scores by drug

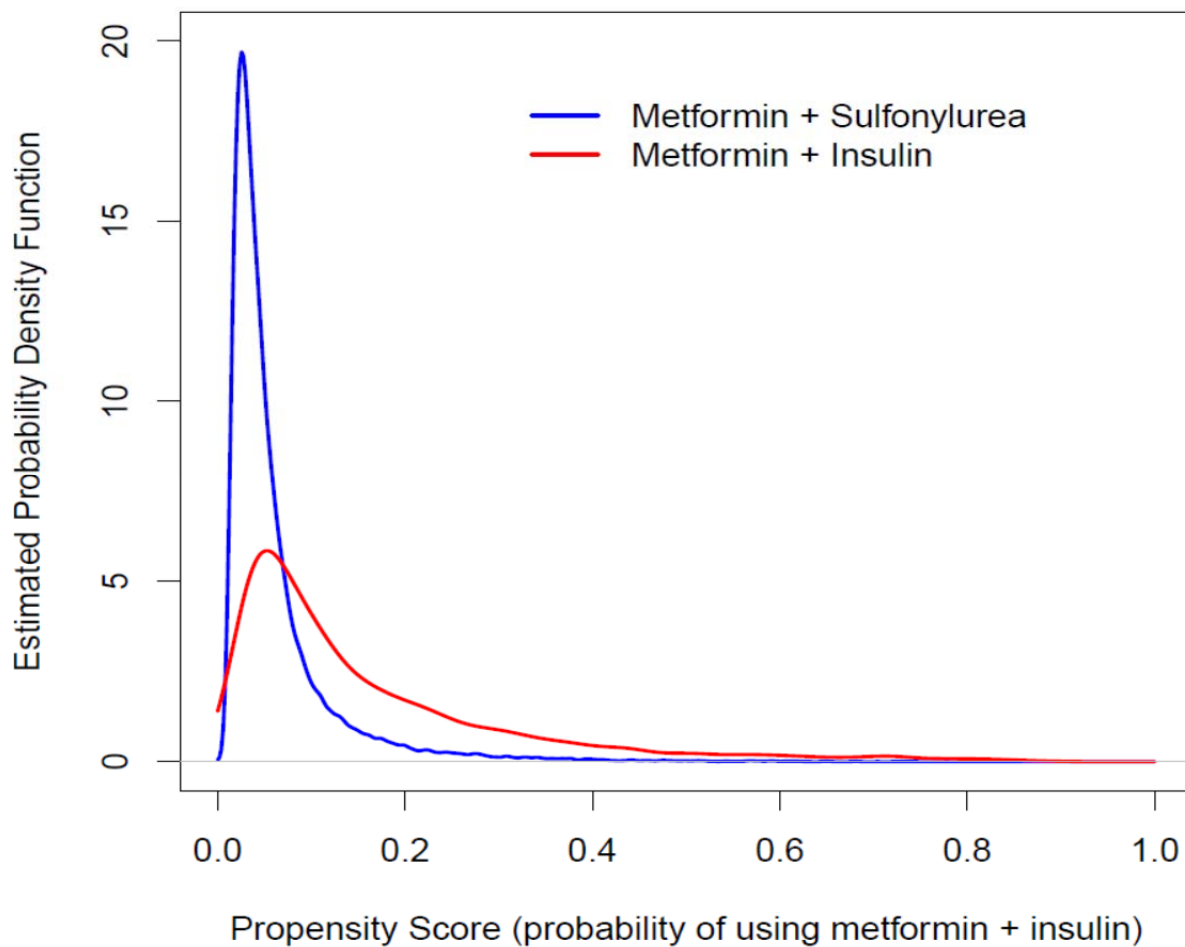

Appendix Figure 3: Adjusted hazard with 95% confidence intervals for risk of first hypoglycemic event and recurrent hypoglycemic event for main outcome definition and sensitivity outcome definitions.

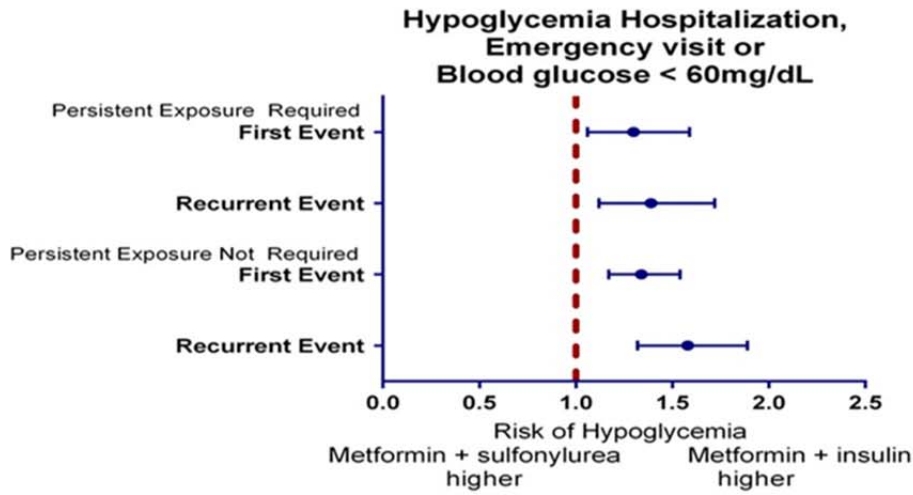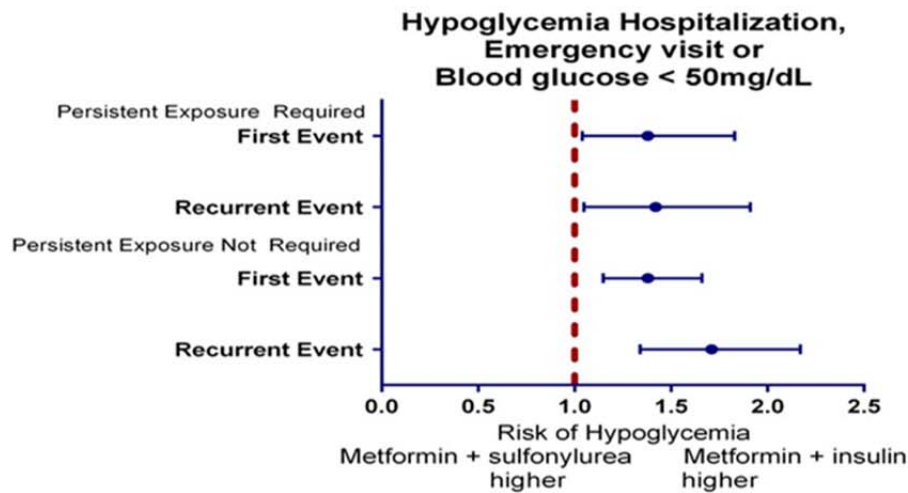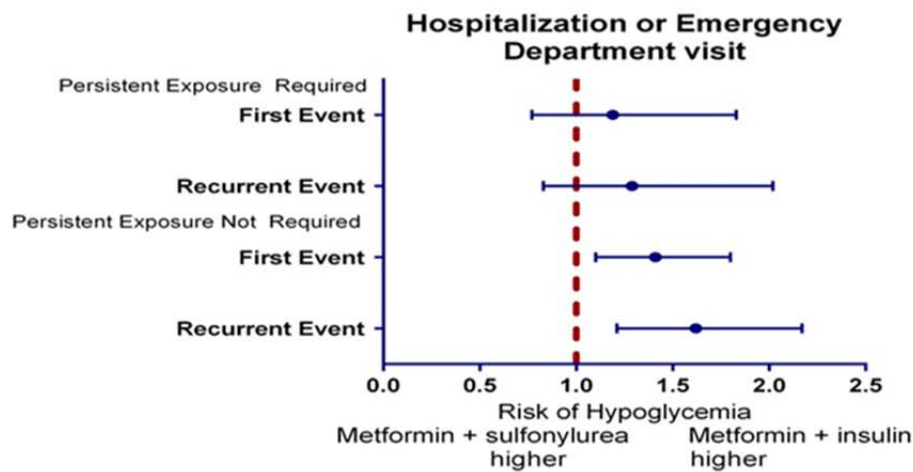

Supplement: 150904-res-1-at.pdf [file 150904-res-1-at.pdf]
